# Supplementary material for: Serum Phytosterols Are Not Associated with Inflammatory Markers in Two Cross-Sectional, Swiss Population-Based Studies (The CoLaus|PsyCoLaus Study)
Source: MDPI journal article supplement (doi:10.3390/nu14122500), 2022-06-16
Supplement: s1 [file s1]

## Supplemental material

**Table S1:** correlation coefficients between sterols and sterol ratios and inflammatory markers, first (2009-2012) and second (2014-2017) follow-ups, CoLaus|PsyCoLaus study, Lausanne, Switzerland.

|                                  | CRP           |               | IL-6          |               | TNF- $\alpha$ |               |
|----------------------------------|---------------|---------------|---------------|---------------|---------------|---------------|
|                                  | First         | Second        | First         | Second        | First         | Second        |
| Cholesterol absorption           |               |               |               |               |               |               |
| Cholestanol [mg/dl]              | <b>-0.114</b> | -0.081        | <b>-0.090</b> | <b>-0.244</b> | <b>-0.088</b> | <b>-0.131</b> |
| Cholesterol synthesis            |               |               |               |               |               |               |
| Lathosterol [mg/dl]              | <b>0.114</b>  | 0.018         | 0.010         | -0.049        | 0.017         | -0.002        |
| Desmosterol [mg/dl]              | <b>0.080</b>  | -0.004        | 0.036         | <b>-0.125</b> | 0.031         | -0.084        |
| Lanosterol [ $\mu$ g/dl]         | <b>0.109</b>  | -0.032        | 0.044         | <b>-0.122</b> | -0.008        | -0.022        |
| Dihydro-lanosterol [ $\mu$ g/dl] | 0.052         | -0.016        | 0.069         | 0.028         | -0.033        | 0.014         |
| Vegetal origin                   |               |               |               |               |               |               |
| Campesterol [mg/dl]              | <b>-0.118</b> | <b>-0.123</b> | -0.023        | <b>-0.143</b> | -0.030        | <b>-0.105</b> |
| Sitosterol [mg/dl]               | <b>-0.130</b> | <b>-0.155</b> | 0.001         | <b>-0.132</b> | 0.007         | -0.083        |
| Brassicasterol [ $\mu$ g/dl]     | <b>-0.060</b> | <b>-0.091</b> | 0.003         | <b>-0.094</b> | -0.016        | <b>-0.139</b> |
| Sitostanol [ $\mu$ g/dl]         | -0.072        | <b>-0.095</b> | 0.057         | <b>-0.093</b> | 0.015         | <b>-0.097</b> |
| Campestanol [ $\mu$ g/dl]        | -0.089        | <b>-0.096</b> | 0.003         | -0.085        | -0.062        | -0.084        |
| Stigmasterol [ $\mu$ g/dl]       | -0.025        | <b>-0.117</b> | 0.078         | 0.000         | -0.013        | -0.016        |
| Ratios                           |               |               |               |               |               |               |
| Cholestanol-to-TC ratio          | <b>-0.111</b> | -0.004        | -0.023        | <b>-0.165</b> | -0.022        | <b>-0.094</b> |
| Synthesis markers-to-TC ratio    | <b>0.135</b>  | 0.035         | <b>0.075</b>  | -0.038        | 0.024         | 0.010         |
| Campesterol-to-cholestanol ratio | -0.057        | <b>-0.094</b> | 0.036         | -0.051        | 0.018         | -0.064        |
| Campesterol-to-TC ratio (100x)   | <b>-0.108</b> | -0.077        | 0.007         | <b>-0.100</b> | -0.004        | -0.083        |
| Stigmasterol-to-TC ratio         | -0.019        | -0.074        | <b>0.108</b>  | 0.055         | 0.017         | 0.005         |
| Sitosterol-to-TC ratio           | <b>-0.115</b> | <b>-0.103</b> | 0.041         | -0.083        | 0.044         | -0.067        |
| Phytosterols-to-TC ratio         | -0.049        | -0.069        | <b>0.104</b>  | 0.036         | 0.037         | -0.017        |

Results are expressed as Spearman nonparametric correlation coefficient. Significant ( $p < 0.05$ ) results are indicated in bold and with a grey background

**Table S2.** Robust regression between inflammatory markers and serum sterol levels and ratios, first (2009-2012) and second (2014-2017) follow-ups, CoLaus|PsyCoLaus study, Lausanne, Switzerland.

|                                  | CRP                                    |                                        | IL-6                                   |                                           | TNF- $\alpha$                             |                                           |
|----------------------------------|----------------------------------------|----------------------------------------|----------------------------------------|-------------------------------------------|-------------------------------------------|-------------------------------------------|
|                                  | FU1                                    | FU2                                    | FU1                                    | FU2                                       | FU1                                       | FU2                                       |
| <b>Cholesterol absorption</b>    |                                        |                                        |                                        |                                           |                                           |                                           |
| Cholestanol [mg/dl]              | -0.571<br>(-1.606 ; 0.464)             | -0.636<br>(-1.529 ; 0.257)             | -0.629<br>(-3.342 ; 2.085)             | <b>-0.549</b><br><b>(-0.803 ; -0.295)</b> | <b>-3.365</b><br><b>(-6.504 ; -0.225)</b> | <b>-1.297</b><br><b>(-2.173 ; -0.420)</b> |
| <b>Cholesterol synthesis</b>     |                                        |                                        |                                        |                                           |                                           |                                           |
| Lathosterol [mg/dl]              | <b>1.392</b><br><b>(0.511 ; 2.272)</b> | -0.266<br>(-1.302 ; 0.769)             | 0.054<br>(-2.248 ; 2.356)              | 0.042<br>(-0.113 ; 0.196)                 | 1.516<br>(-1.164 ; 4.196)                 | -0.017<br>(-0.545 ; 0.511)                |
| Desmosterol [mg/dl]              | -0.135<br>(-0.824 ; 0.555)             | -0.188<br>(-0.997 ; 0.621)             | -0.888<br>(-2.668 ; 0.891)             | <b>-0.230</b><br><b>(-0.471 ; 0.011)</b>  | 0.438<br>(-1.636 ; 2.512)                 | -0.744<br>(-1.572 ; 0.084)                |
| Lanosterol [ $\mu$ g/dl]         | <b>0.009</b><br><b>(0.002 ; 0.016)</b> | 0.009<br>(-0.009 ; 0.027)              | 0.005<br>(-0.013 ; 0.023)              | -0.004<br>(-0.009 ; 0.001)                | 0.003<br>(-0.019 ; 0.024)                 | 0.004<br>(-0.014 ; 0.022)                 |
| Dihydro-lanosterol [ $\mu$ g/dl] | 0.016<br>(-0.014 ; 0.045)              | <b>0.403</b><br><b>(0.040 ; 0.766)</b> | <b>0.109</b><br><b>(0.032 ; 0.186)</b> | 0.063<br>(-0.043 ; 0.170)                 | -0.030<br>(-0.119 ; 0.060)                | 0.178<br>(-0.189 ; 0.544)                 |
| <b>Vegetal origin</b>            |                                        |                                        |                                        |                                           |                                           |                                           |
| Campesterol [mg/dl]              | 0.142<br>(-0.368 ; 0.651)              | -0.505<br>(-1.174 ; 0.163)             | 0.253<br>(-1.060 ; 1.566)              | -0.140<br>(-0.338 ; 0.058)                | -0.895<br>(-2.422 ; 0.633)                | <b>-0.888</b><br><b>(-1.555 ; -0.221)</b> |
| Sitosterol [mg/dl]               | -0.141<br>(-0.928 ; 0.646)             | -0.691<br>(-1.553 ; 0.170)             | 1.385<br>(-0.642 ; 3.412)              | -0.182<br>(-0.438 ; 0.074)                | -0.155<br>(-2.526 ; 2.216)                | <b>-0.706</b><br><b>(-1.580 ; 0.167)</b>  |
| Brassicasterol [ $\mu$ g/dl]     | 0.006<br>(-0.002 ; 0.015)              | -0.008<br>(-0.018 ; 0.002)             | 0.015<br>(-0.008 ; 0.038)              | -0.002<br>(-0.005 ; 0.001)                | -0.005<br>(-0.032 ; 0.022)                | <b>-0.019</b><br><b>(-0.029 ; -0.009)</b> |
| Sitostanol [ $\mu$ g/dl]         | -0.009<br>(-0.033 ; 0.015)             | -0.008<br>(-0.055 ; 0.040)             | 0.043<br>(-0.019 ; 0.106)              | -0.012<br>(-0.026 ; 0.003)                | 0.042<br>(-0.031 ; 0.116)                 | -0.042<br>(-0.091 ; 0.007)                |
| Campestanol [ $\mu$ g/dl]        | -0.013<br>(-0.038 ; 0.011)             | -0.055<br>(-0.123 ; 0.013)             | -0.001<br>(-0.065 ; 0.063)             | -0.012<br>(-0.032 ; 0.008)                | -0.036<br>(-0.111 ; 0.039)                | -0.062<br>(-0.132 ; 0.007)                |
| Stigmasterol [ $\mu$ g/dl]       | 0.009<br>(-0.015 ; 0.034)              | -0.010<br>(-0.04 ; 0.020)              | <b>0.106</b><br><b>(0.041 ; 0.170)</b> | 0.004<br>(-0.004 ; 0.013)                 | -0.037<br>(-0.111 ; 0.038)                | 0.012<br>(-0.018 ; 0.042)                 |
| <b>Ratios</b>                    |                                        |                                        |                                        |                                           |                                           |                                           |

|                                   |                                        |                                        |                                        |                                           |                            |                                           |
|-----------------------------------|----------------------------------------|----------------------------------------|----------------------------------------|-------------------------------------------|----------------------------|-------------------------------------------|
| Cholestanol-to-TC ratio           | -0.132<br>(-0.416 ; 0.152)             | -0.042<br>(-0.236 ; 0.151)             | 0.292<br>(-0.441 ; 1.024)              | <b>-0.129</b><br><b>(-0.184 ; -0.074)</b> | -0.580<br>(-1.438 ; 0.278) | <b>-0.381</b><br><b>(-0.573 ; -0.190)</b> |
| Synthesis markers-to-TC ratio     | <b>0.002</b><br><b>(0.001 ; 0.004)</b> | <b>0.004</b><br><b>(0.001 ; 0.008)</b> | 0.003<br>(-0.001 ; 0.007)              | -0.001<br>(-0.002 ; 0)                    | 0.002<br>(-0.002 ; 0.007)  | 0.000<br>(-0.004 ; 0.004)                 |
| Campesterol-to-cholestanol ratio  | 0.045<br>(-0.140 ; 0.230)              | -0.119<br>(-0.409 ; 0.172)             | 0.154<br>(-0.322 ; 0.631)              | 0.006<br>(-0.080 ; 0.092)                 | 0.019<br>(-0.538 ; 0.575)  | -0.268<br>(-0.561 ; 0.026)                |
| Campesterol-to-TC ratio<br>(100x) | 0.045<br>(-0.072 ; 0.162)              | -0.078<br>(-0.206 ; 0.050)             | 0.168<br>(-0.134 ; 0.470)              | -0.029<br>(-0.067 ; 0.009)                | -0.127<br>(-0.480 ; 0.226) | <b>-0.185</b><br><b>(-0.313 ; -0.058)</b> |
| Stigmasterol-to-TC ratio          | 0.003<br>(-0.003 ; 0.008)              | 0.000<br>(-0.006 ; 0.006)              | <b>0.033</b><br><b>(0.018 ; 0.048)</b> | 0.001<br>(-0.001 ; 0.002)                 | -0.003<br>(-0.02 ; 0.014)  | 0.001<br>(-0.005 ; 0.007)                 |
| Sitosterol-to-TC ratio            | -0.024<br>(-0.207 ; 0.158)             | -0.105<br>(-0.269 ; 0.058)             | <b>0.532</b><br><b>(0.062 ; 1.003)</b> | -0.039<br>(-0.088 ; 0.010)                | 0.186<br>(-0.365 ; 0.738)  | -0.161<br>(-0.326 ; 0.004)                |
| Phytosterols-to-TC ratio          | 0.000<br>(-0.003 ; 0.003)              | 0.001<br>(-0.003 ; 0.005)              | <b>0.014</b><br><b>(0.007 ; 0.022)</b> | 0.000<br>(-0.002 ; 0.001)                 | 0.005<br>(-0.005 ; 0.014)  | -0.002<br>(-0.006 ; 0.002)                |

CRP, C-reactive protein; FU, follow-up; IL-6, interleukin 6; TNF- $\alpha$ , tumor necrosis factor alpha. Results are expressed as slope and (95% confidence interval). Statistical analysis conducted by robust regression adjusting for age (continuous), sex (male, female), BMI (continuous), metformin (yes, no) and statin use (yes, no). Significant ( $p < 0.05$ ) associations are indicated in bold.
